# Supplementary material
Source: publisher figshare collection journal article supplement (https://acs.figshare.com/ndownloader/files/26639501)
Supplement: Supplementary file [file 26639501]

## Supporting Information

Title: Ultrafast, One-Step, Salt-Solution-Based Acoustic Synthesis of  $\text{Ti}_3\text{C}_2$  MXene

*Ahmed El Ghazaly<sup>§‡</sup>, Heba Ahmed<sup>£‡</sup>, Amgad R Rezk<sup>£</sup>, Joseph Halim<sup>§</sup>, Per O. Å. Persson<sup>§</sup>, Leslie Y Yeo<sup>£\*</sup>, Johanna Rosen<sup>§\*</sup>*

<sup>§</sup> Department of Physics, Chemistry, and Biology (IFM) Linköping University, SE-581 83 Linköping, Sweden.

<sup>£</sup> Micro/Nanophysics Research Laboratory, RMIT University, Melbourne, Victoria 3000, Australia.

<sup>‡</sup> These authors contributed equally to this work.

\* Correspondence to: [leslie.yeo@rmit.edu.au](mailto:leslie.yeo@rmit.edu.au) , [johanna.rosen@liu.se](mailto:johanna.rosen@liu.se).

## Supplementary Text

### Estimation of number of devices required for synthesis of 1 kg MXene per week.

Ti<sub>3</sub>AlC<sub>2</sub> MAX Phase: 100 mg in 20 ml solution

MXene output: ~ 12 mg

Number of devices: 1

Flow rate: 0.2ml/min (*i.e.* 20 ml ~ 100 minutes)

The data above implies 12 mg MXene in 100 minutes for one device, which equals 0.173 g in 1 day.

For 830 devices, we will then produce 143.5 g /day. In a week that equals to 1 kg of MXene.

### The level of safety of the SAW- and LiF-based method for producing Ti<sub>3</sub>C<sub>2</sub>T<sub>z</sub> from Ti<sub>3</sub>AlC<sub>2</sub>:

The input and the output of the technique are acid-free. The input comprises LiF (salt), MAX phase (Ti<sub>3</sub>AlC<sub>2</sub>) and water. The output comprises MXene (Ti<sub>3</sub>C<sub>2</sub>T<sub>z</sub>), unetched MAX phase (Ti<sub>3</sub>AlC<sub>2</sub>), LiF residual particles, and water. During the process “*in situ* HF” is created with a maximum concentration of 0.1%, which is at the lower limit for the least hazardous HF concentration according to <https://www.prevent.se/amnesomrade/kemiska-risker/>. The hazards and safety precautions are found below. This amount of “*in situ* HF” is formed during the process in an enclosed container, and when the process is stopped, the F ions are depleted. This is because the amount of F<sup>-</sup> ions produced from the dissolution of LiF in water is not sufficient to convert all Al in the MAX phase to AlF<sub>3</sub> hydrates. Therefore, the outcome of the process is acid free.

## Fluoric acid (aqueous)

### CLP-Classification

|      |                                                |
|------|------------------------------------------------|
| H300 | Acute Tox. 2 - Acute toxicity                  |
| H310 | Acute Tox. 1 - Acute toxicity                  |
| H314 | Skin Corr. 1A - Skin corrosion/irritation      |
| H318 | Eye Dam. 1 - Serious eye damage/eye irritation |
| H318 | Eye Dam. 1 - Serious eye damage/eye irritation |
| H330 | Acute Tox. 2 - Acute toxicity                  |

### CLP-Marking

#### Concentration range

0.1% - 0.25%

### Hazard pictograms

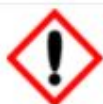

### Signal word

WARNING

### Hazard statements

|      |                               |
|------|-------------------------------|
| H319 | Causes serious eye irritation |
|------|-------------------------------|

### Precautionary statement - Prevention

|      |                                                                            |
|------|----------------------------------------------------------------------------|
| P264 | Wash ... thoroughly after handling.                                        |
| P280 | Wear protective gloves/protective clothing/eye protection/face protection. |

### Precautionary statement - Response

|           |                                                           |
|-----------|-----------------------------------------------------------|
| P337+P313 | If eye irritation persists: Get medical advice/attention. |
|-----------|-----------------------------------------------------------|

### Remarks

Harmonised classification according to (EG) nr 1272/2008.

**Figure S1:** Safety data sheet for 0.1-0.25 % conc. HF.

### Electrochemical Characterization

Figure S4A presents the cyclic voltammogram profile of  $\text{Ti}_3\text{C}_2\text{T}_z$  collected at  $10 \text{ mV s}^{-1}$  in  $1 \text{ M H}_2\text{SO}_4$  electrolyte. Redox peaks can be identified in the CV profile, with both the oxidation peak and the reduction peak located at  $-0.55 \text{ V}$  showing a highly reversible redox reaction. The open circuit voltage (OCV) was stable at  $0.3 \text{ V}$ . The electrodes used for current collection were glassy carbon, having the ability to suppress the hydrogen evolution reaction, with a wide voltage window of  $0.9 \text{ V}$ . The charge storage mechanisms were studied for the  $\text{Ti}_3\text{C}_2\text{T}_z$  electrode through the CV currents collected at different scan rates, a method reported by Wang *et al.*,<sup>23]</sup> that relates the sweep rates and collected current through the  $i = av^b$  formula, in which the  $b$  value is the slope of the  $\log I$  versus  $\log V$  curve. The storage mechanism is diffusion limited if the  $b$  value is  $\sim 0.5$ , while a capacitive storage mechanism is dominant for a  $b$  value of  $1$ . As shown in Fig. S4A, the  $b$  value is close to  $1$  at different scan rates. Figure S4B shows the Nyquist plot, and the observed straight vertical line in the low frequency region is an indication of pure capacitive behavior for the  $\text{Ti}_3\text{C}_2\text{T}_z$  electrode. From the real axis, the equivalent series resistance (ESR) was  $0.08 \Omega \cdot \text{cm}^2$ . Both electrochemical stability and Coulombic efficiency are decisive factors in the evaluation of any energy storage system. By charging and discharging at a current density of  $10 \text{ A g}^{-1}$  for  $10,000$  cycles, the  $\text{Ti}_3\text{C}_2\text{T}_z$  electrode (three-electrodes system) shows  $92\%$  stability and almost  $100\%$  Columbic efficiency (see Figure S4C), demonstrating outstanding long-life electrochemical stability. In the inset, the symmetric shape of the galvanostatic cycling profile is shown, being maintained after  $10,000$  cycles with only a very insignificant reduction in the capacitance. The CV profiles for a  $2 \mu\text{m}$  film (see Fig. S4D) shows that the MXene charging mechanism is more or less maintained for different scan rates. Furthermore, a high-rate performance was observed. Figure S2E represents the method to calculate the  $b$ -value fitting parameter. The symmetrical behavior in the charge-discharge curves at various current densities, shown in Fig. S4F, confirms the high electrochemical reversibility.

For the sake of comparison between the produced MXene from the mild conventional etching ( $F_1$ ) and the SAW technique ( $F_2$ ), we prepare  $Ti_3C_2$  MXene by mild conventional etching (12 M HCl and 5M LiF) and filter a film from an unwashed colloidal solution. This allows a more direct comparison to the results from the film originating from the SAW technique.

The XRD patterns in Fig S6a show that both the  $F_1$  and  $F_2$  films contain residual LiF particles. The electrochemical performance of a washed and unwashed film from conventional mild synthesis is 230 and 210  $Fg^{-1}$ , respectively, *i.e.*, about 8 % reduction when washing is omitted. This is close to within the experimental error range.

A comparison between the  $F_1$  and  $F_2$  films is shown in Figure S6b indicating that the film originating from the SAW technique has about 14% lower capacitance at low scan rates compared to the conventionally derived material, though this difference decreases with increasing scan rate. It should be stressed that the initial work on SAW-facilitated MXene is produced for proof of concept, and the slight difference may at least in part be due to changes in the electrode materials (density, thickness, sheet size, *etc.*)

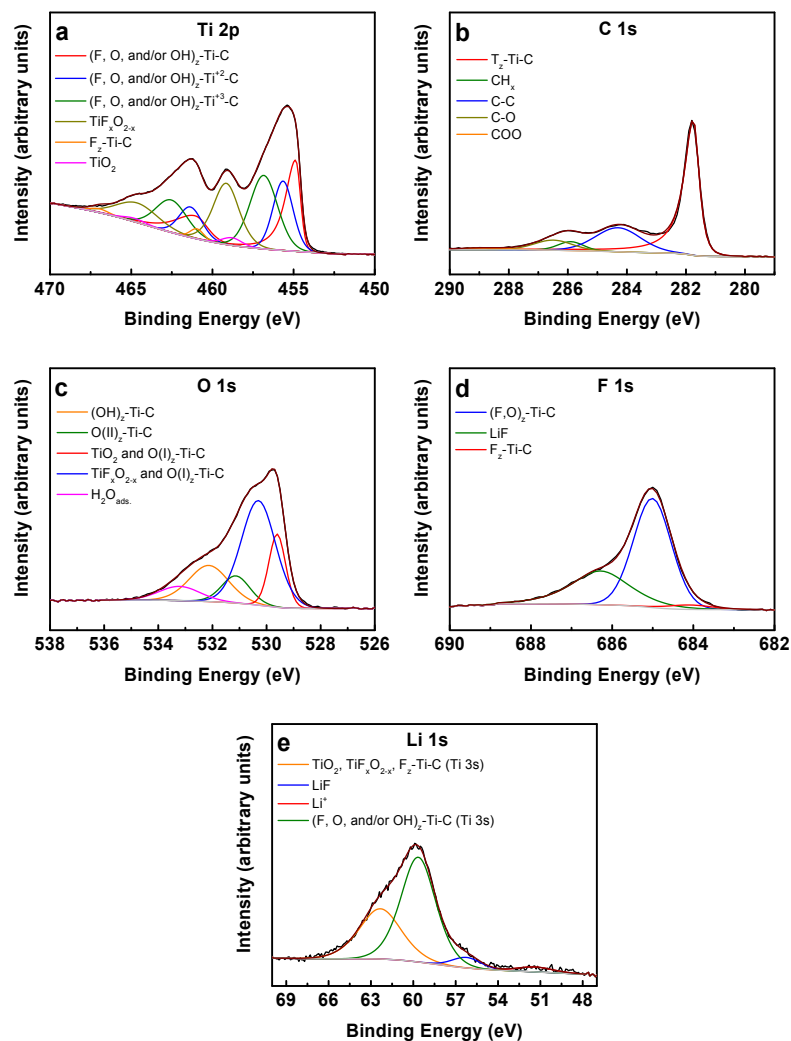

**Figure S2.** XPS spectra with curve-fitting for Ti<sub>3</sub>C<sub>2</sub>T<sub>z</sub> of the following regions: (A) Ti 2p, (B) C 1s, (C) O 1s, (D) F 1s and (E) Li 1s. Details for the labeled species are tabulated in Table S1.

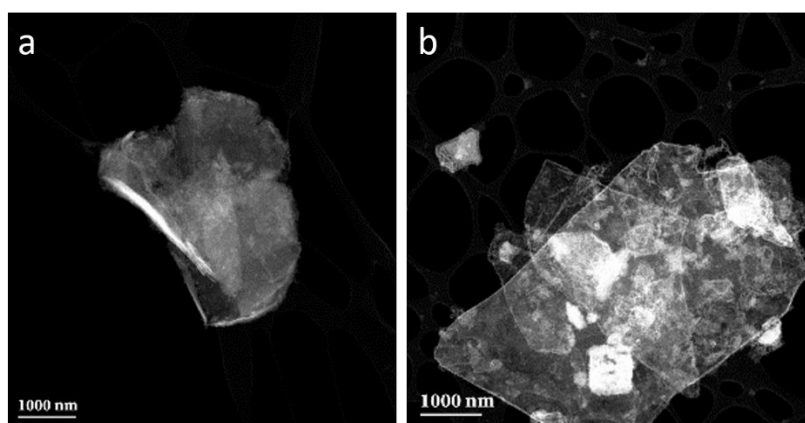

**Figure S3.** TEM analysis showing as prepared  $\text{Ti}_3\text{C}_2$  single MXene sheets ( $> 1 \mu\text{m}$ ).

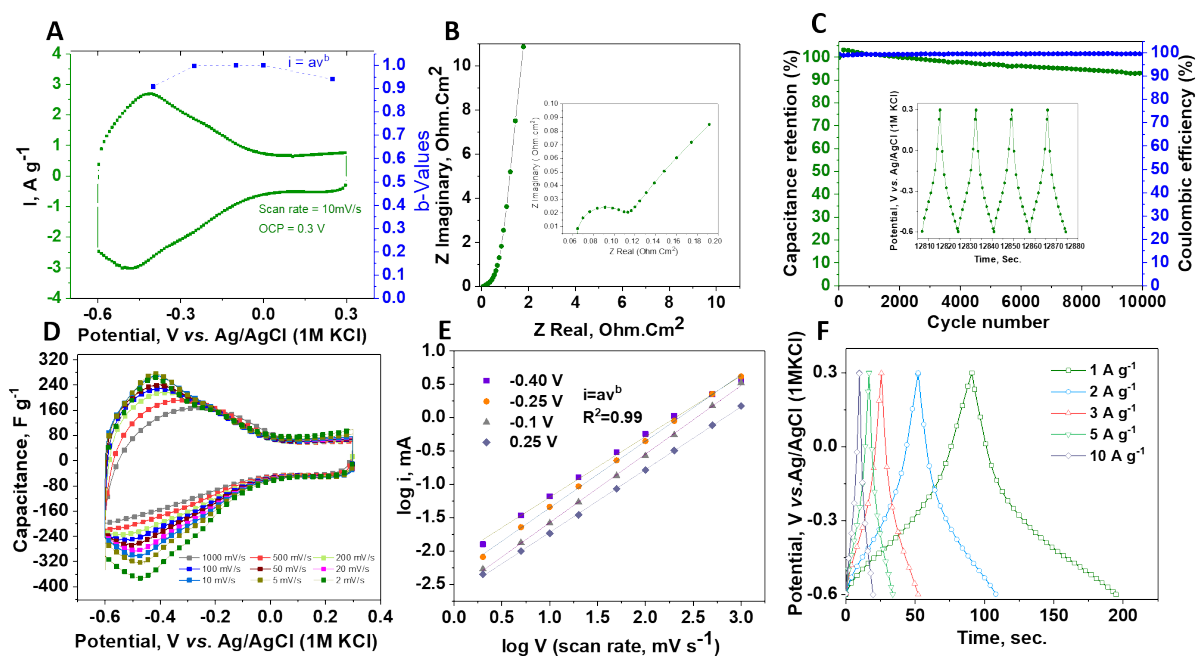

**Figure S4.** Electrochemical behaviour for a freestanding  $\text{Ti}_3\text{C}_2\text{T}_z$  MXene film in 1 M  $\text{H}_2\text{SO}_4$  vs. Ag/AgCl in 1M KCl. **(A)** Cyclic voltammetry profile measured at 10  $\text{mV S}^{-1}$ . The b-values (blue symbols) are the slope of the logarithmic anodic current peaks against the logarithmic scan rates (2–1000  $\text{mV s}^{-1}$ ). **(B)** Nyquist plots of MXene collected *via* EIS; the inset shows the values in the low frequency region. **(C)** Capacitance retention and Coulombic efficiency test for a 2  $\mu\text{m}$  film electrode; the inset shows the galvanostatic charge/discharge at 10  $\text{A g}^{-1}$ . **(D)** Normalized cyclic voltammetry profile measured at 2–1000  $\text{mV S}^{-1}$  for the 2  $\mu\text{m}$  film. **(E)** Logarithmic anodic current peaks vs. logarithmic scan rates (2–1000  $\text{mV S}^{-1}$ ) at different voltage windows for the 2  $\mu\text{m}$  electrode. **(F)** Galvanostatic cycling at 1, 2, 3, 5 and 10  $\text{A g}^{-1}$ .



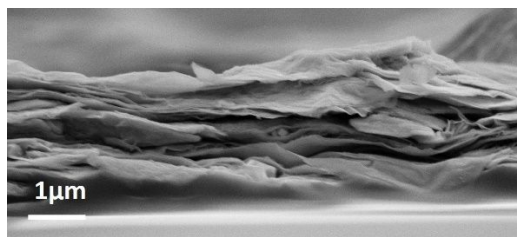

**Figure S5.** SEM image showing a cross-section of a  $\text{Ti}_3\text{C}_2\text{T}_z$  MXene film of approximately 2  $\mu\text{m}$  thickness used for electrochemical characterization.

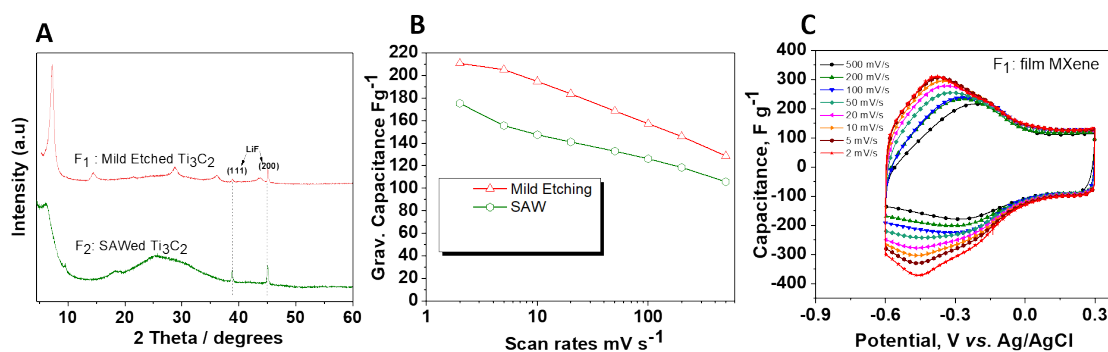

**Figure S6.** (A) XRD pattern for a free-standing film of  $\text{Ti}_3\text{C}_2\text{T}_z$  MXene from Mild etching (F1) and from the SAW techniques (F2), without HCl and LiCl treatment to remove LiF residuals. (B) Gravimetric capacitance of  $\text{Ti}_3\text{C}_2\text{T}_z$  MXene films in 1 M  $\text{H}_2\text{SO}_4$  vs. Ag/AgCl in 1M KCl. (C) Cyclic voltammetry of the F<sub>1</sub> film at various scan rates.

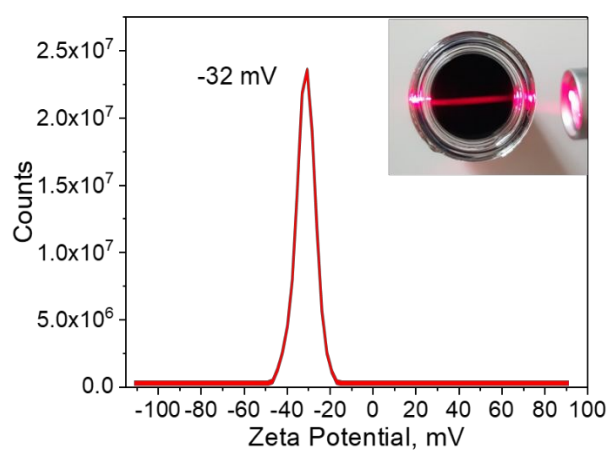

**Figure S7.** Zeta potential measurements of  $\text{Ti}_3\text{C}_2\text{T}_x$  MXene sheets produced by the SAW technique, and a digital photo (figure inset) of the MXene colloids clearly showing a discernible Tyndall scattering effect.

**Table S1.** Summary of global atomic percentages obtained from the high resolution XPS spectra of the following regions: Ti 2p, C 1s, O 1s, F 1s, Al 2p and Cl 2p of a  $\text{Ti}_3\text{C}_2\text{T}_z$  freestanding film.

| Elements                          | Ti at. % | C at. %  | O at.%   | F at. %  | Cl at. % | Li at. % | Al at. % |
|-----------------------------------|----------|----------|----------|----------|----------|----------|----------|
| $\text{Ti}_3\text{C}_2\text{T}_z$ | 31.5±0.3 | 28.4±0.5 | 19.5±0.8 | 10.9±0.2 | 1.5±0.1  | 7.9±0.2  | 0.3±0.2  |

**Table S2.** XPS peak fitting results of  $\text{Ti}_3\text{C}_2\text{T}_z$  for the following regions: Ti 2p, C 1s, O 1s, F 1s and Li 1s.

| Region | BE [eV] <sup>a</sup> | FWHM [eV] <sup>a</sup> | Fraction | Assigned to                                                   | Reference |
|--------|----------------------|------------------------|----------|---------------------------------------------------------------|-----------|
| Ti 2p  | 454.9 (461.1)        | 0.7 (1.3)              | 0.22     | (F, OH, and/or O)-Ti-C                                        | (1,2,3)   |
|        | 455.7 (461.3)        | 1.4 (2.1)              | 0.20     | (F, OH, and/or O)-Ti <sup>2+</sup> -C                         |           |
|        | 456.8 (462.5)        | 2.0 (2.3)              | 0.29     | (F, OH, and/or O)-Ti <sup>3+</sup> -C                         |           |
|        | 458.7 (464.7)        | 1.5 (3.7)              | 0.03     | TiO <sub>2</sub>                                              |           |
|        | 459.2 (464.7)        | 1.8 (2.6)              | 0.22     | TiF <sub>x</sub> O <sub>2-x</sub>                             |           |
|        | 461.0 (467.0)        | 1.7 (2.7)              | 0.04     | F <sub>z</sub> -Ti-C                                          |           |
| C 1s   | 281.8                | 0.5                    | 0.61     | T <sub>z</sub> -Ti-C                                          | (1,2,3)   |
|        | 284.3                | 1.8                    | 0.24     | C-C                                                           |           |
|        | 285.9                | 1.0                    | 0.05     | CH <sub>x</sub>                                               |           |
|        | 286.5                | 1.5                    | 0.08     | C-O                                                           |           |
|        | 288.8                | 2.0                    | 0.02     | COO                                                           |           |
| O 1s   | 529.6                | 0.7                    | 0.16     | TiO <sub>2</sub> and O(I) <sub>z</sub> -Ti-C                  | (1,2,3)   |
|        | 530.3                | 1.5                    | 0.47     | TiF <sub>x</sub> O <sub>2-x</sub> and O(I) <sub>z</sub> -Ti-C |           |
|        | 531.1                | 1.2                    | 0.10     | O(II) <sub>z</sub> -Ti-C/OR <sup>b</sup>                      |           |
|        | 532.1                | 1.7                    | 0.19     | (OH) <sub>z</sub> -Ti-C/OR <sup>b</sup>                       |           |
|        | 533.2                | 1.8                    | 0.08     | H <sub>2</sub> O <sub>ads</sub> /OR <sup>b</sup>              |           |
| F 1s   | 684.1                | 1.3                    | 0.03     | (F) <sub>z</sub> -Ti-C                                        | (1,2,3)   |
|        | 685.0                | 1.1                    | 0.64     | (F, O) <sub>z</sub> -Ti-C                                     | (1,2,3)   |
|        | 686.3                | 1.7                    | 0.33     | LiF                                                           | (4,5)     |

|       |      |     |      |                                                                                        |       |
|-------|------|-----|------|----------------------------------------------------------------------------------------|-------|
| Li 1s |      |     |      | Li <sup>+</sup> (Li 1s)                                                                | (4,5) |
|       | 51.4 | 3.0 | 0.37 | LiF (Li 1s)                                                                            |       |
|       | 56.2 | 2.4 | 0.63 | (F, O, and/or OH) <sub>z</sub> -Ti-C                                                   |       |
|       | 59.6 | 2.9 |      | (Ti 3s)                                                                                |       |
|       | 62.3 | 3.5 |      | TiO <sub>2</sub> , TiF <sub>x</sub> O <sub>2-x</sub> , F <sub>z</sub> -Ti-C<br>(Ti 3s) |       |

<sup>a</sup> Values in parentheses correspond to the 2p<sub>1/2</sub> component.

<sup>b</sup> OR denotes the organic compounds that are present due to atmospheric surface contamination.

Note: the TiO<sub>2</sub> and TiF<sub>x</sub>O<sub>2-x</sub> species are formed during exposure of the sample to the ambient during transfer to the XPS (the formation of such oxides is common for MXene washing and/or exposure to the ambient).<sup>5</sup>

**Table S3.** List of various species assigned by XPS analysis.

| Species Names                                                                                                    | What does it belong to                                                                                                 |
|------------------------------------------------------------------------------------------------------------------|------------------------------------------------------------------------------------------------------------------------|
| (F, OH, and/or O)-Ti-C,<br>(F, OH, and/or O)-Ti <sup>2+</sup> -C<br>and<br>(F, OH, and/or O)-Ti <sup>3+</sup> -C | Ti belonging to MXene compound with various oxidation states and terminated by F, O and/or OH surface groups           |
| TiO <sub>2</sub> , and TiF <sub>x</sub> O <sub>2-x</sub>                                                         | Surface oxides and oxyfluorides usually found on the surface of the sample due to its contact with oxygen from the air |
| F <sub>x</sub> -Ti-C                                                                                             | MXene terminated by F surface group without the influence of other adsorbates or surface groups                        |
| T <sub>z</sub> -Ti-C                                                                                             | C belonging to the MXene compound, where the MXene is terminated by F, O and/or OH surface groups                      |
| C-C, CH <sub>x</sub> , C-O, and COO                                                                              | Hydrocarbons not belonging to the MXene compound due to surface contamination and/or during washing                    |
| O(I) <sub>z</sub> -Ti-C                                                                                          | Oxygen surface termination bridging to Ti atoms belongs to the MXene structure                                         |
| O(II) <sub>z</sub> -Ti-C                                                                                         | Oxygen surface termination occupying the FCC site belongs to the MXene structure                                       |
| H <sub>2</sub> O <sub>ads</sub>                                                                                  | Adsorbed water on the MXene sheets                                                                                     |

|                                      |                                                                                              |
|--------------------------------------|----------------------------------------------------------------------------------------------|
| $(\text{F}, \text{O})_z\text{-Ti-C}$ | MXene terminated by F surface group with the influence of other adsorbates or surface groups |
| LiF                                  | Unwashed LiF compound present from the etching solution                                      |
| $\text{Li}^+$                        | Li ions intercalated between the MXene sheets                                                |

**Table S4.** Gravimetric and volumetric capacitance for a  $\text{Ti}_3\text{C}_2\text{T}_z$  electrode.

| Scan rate | Gravimetric capacitance, $\text{F g}^{-1}$ | Volumetric capacitance, $\text{F cm}^{-3}$ |
|-----------|--------------------------------------------|--------------------------------------------|
| 2         | 174                                        | 470                                        |
| 5         | 156                                        | 420                                        |
| 10        | 147                                        | 398                                        |
| 20        | 141                                        | 381                                        |
| 50        | 133                                        | 359                                        |
| 100       | 126                                        | 340                                        |
| 200       | 118                                        | 320                                        |
| 500       | 106                                        | 286                                        |
| 1000      | 93                                         | 250                                        |

References:

1. Halim, J.; Cook, K. M.; Naguib, M.; Eklund, P.; Gogotsi, Y.; Rosen, J.; Barsoum, M. W., X-Ray Photoelectron Spectroscopy of Select Multi-Layered Transition Metal Carbides (MXenes). *Applied Surface Science* **2016**, *362*, 406-417.
2. Ren, C. E.; Zhao, M.-Q.; Makaryan, T.; Halim, J.; Boota, M.; Kota, S.; Anasori, B.; Barsoum, M. W.; Gogotsi, Y., Porous Two-Dimensional Transition Metal Carbide (MXene) Flakes for High-Performance Li-Ion Storage. *ChemElectroChem* **2016**, *3*, 689-693.
3. Dall'Agnese, Y.; Lukatskaya, M. R.; Cook, K. M.; Taberna, P.-L.; Gogotsi, Y.; Simon, P., High Capacitance of Surface-Modified 2D Titanium Carbide in Acidic Electrolyte. *Electrochemistry Communications* **2014**, *48*, 118-122.



4. Verger, L.; Natu, V.; Ghidui, M.; Barsoum, M. W., Effect of Cationic Exchange on The Hydration and Swelling Behavior of  $\text{Ti}_3\text{C}_2\text{T}_z$  Mxenes. *The Journal of Physical Chemistry C* **2019**, *123*, 20044-20050.
5. J. Halim, I. Persson, P. Eklund, P. O. Å. Persson, J. Rosen, Sodium Hydroxide and Vacuum Annealing Modifications of The Surface Terminations of a  $\text{Ti}_3\text{C}_2$  (Mxene) Epitaxial Thin Film. *RSC Adv.* **2018**, *8*, 36785-36790.
